# Supplementary figures and images for: Arginase Inhibition Mitigates Bortezomib-Exacerbated Cardiotoxicity in Multiple Myeloma
Source: MDPI journal article supplement (doi:10.3390/cancers15072191), 2023-04-06

## Week 2

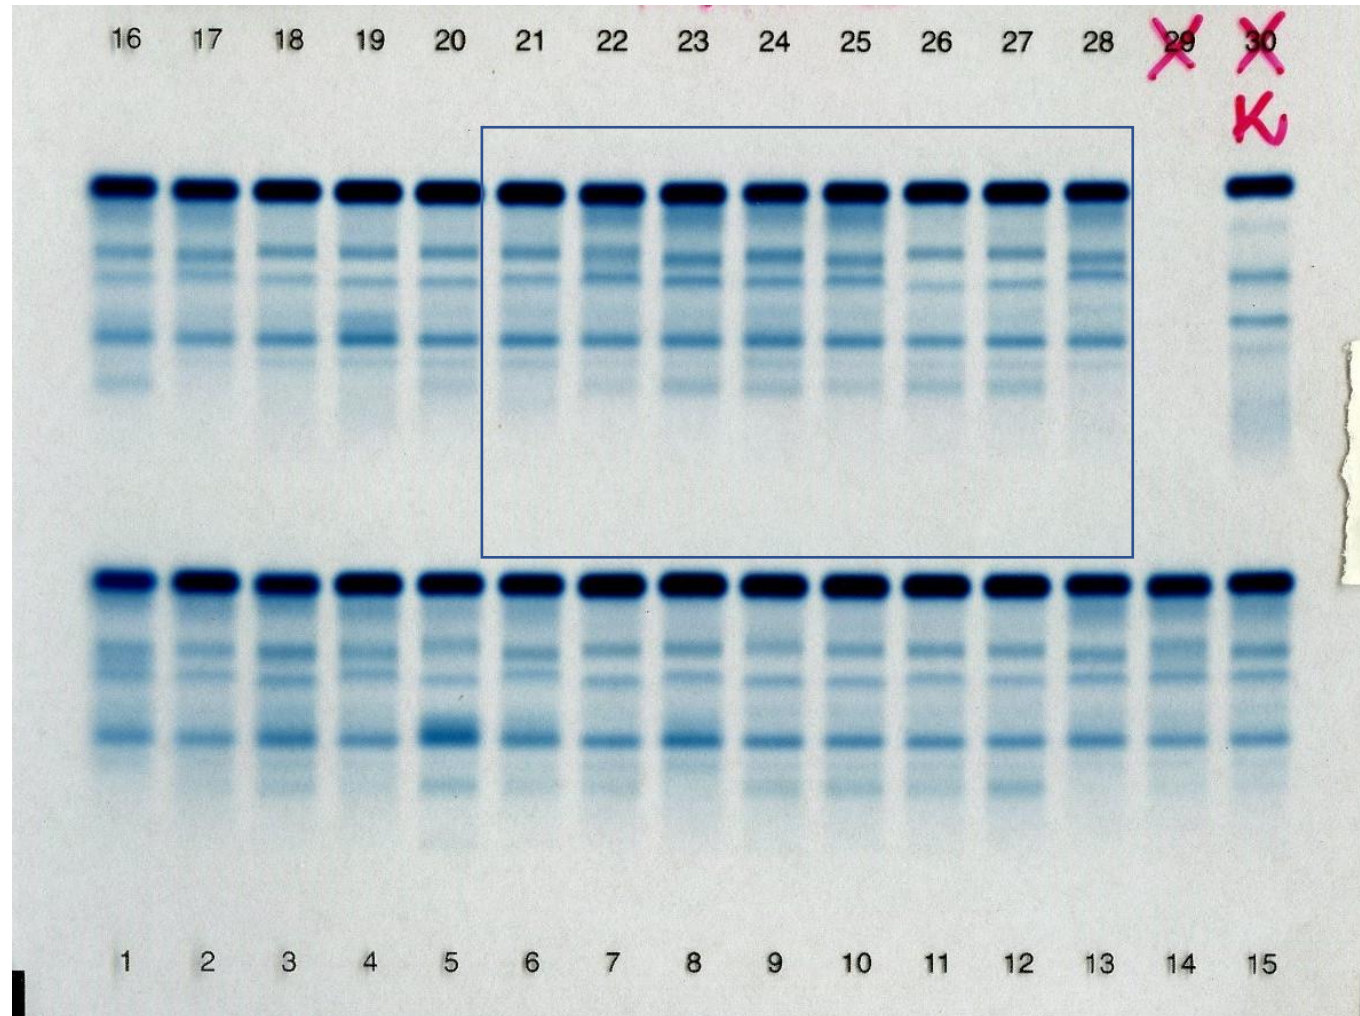

Week 6

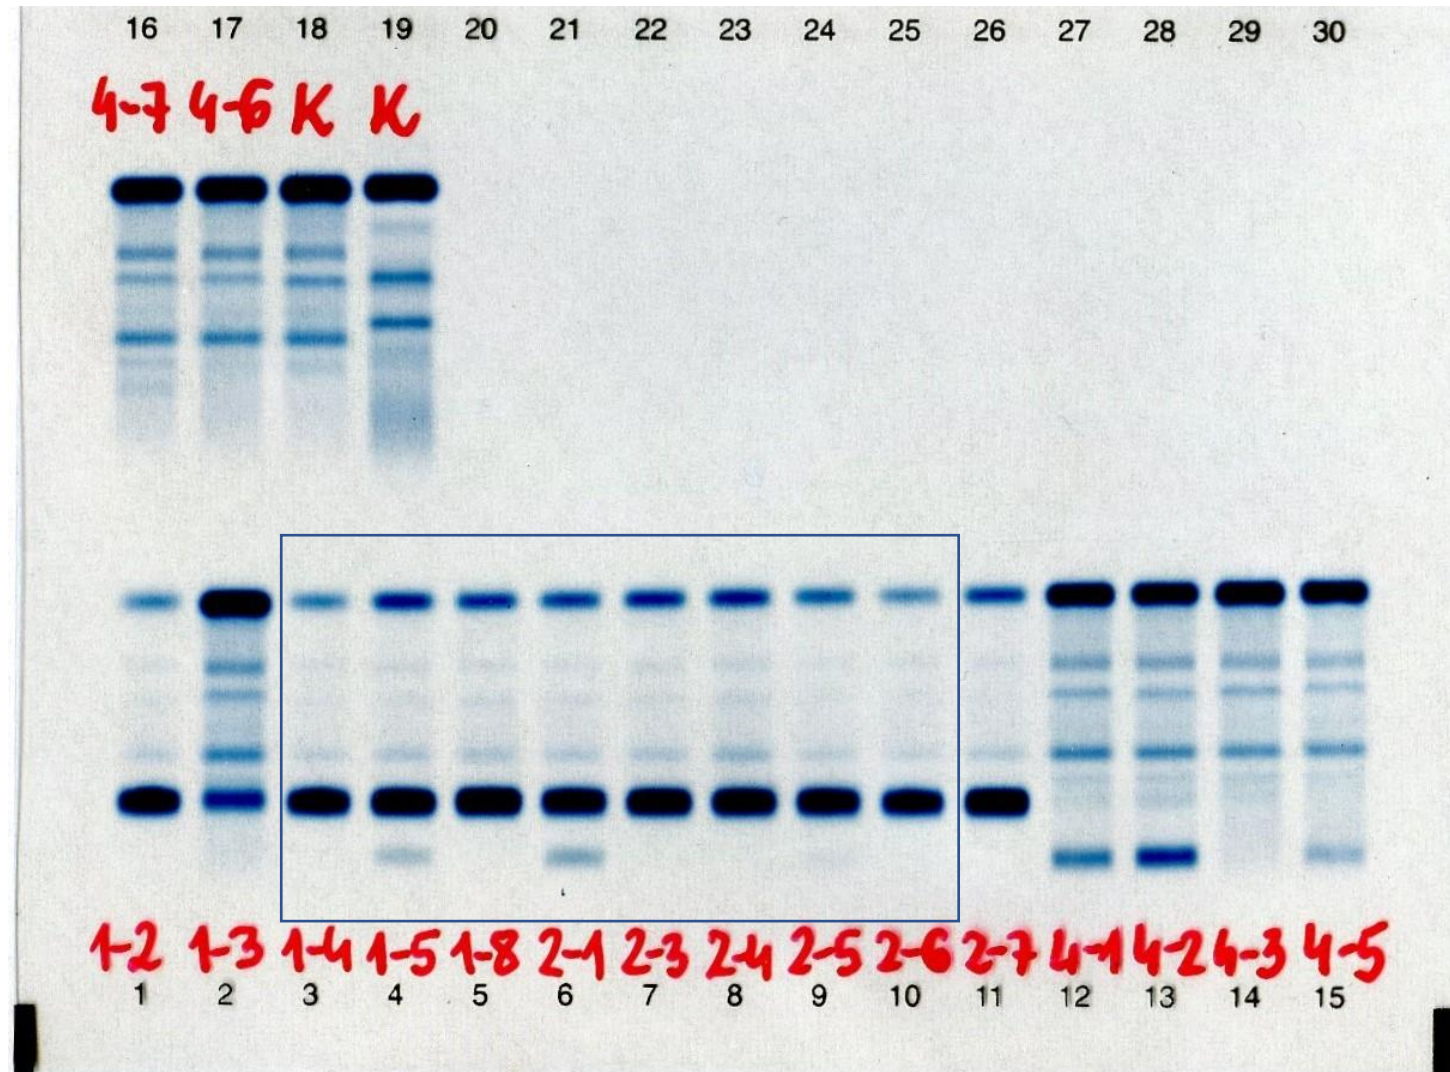

Supplement: s1 [file s1]
